# Supplementary material for: Tin oxide nanoparticles modified by copper as novel catalysts for the luminol–H2O2 based chemiluminescence system
Source: Royal Society of Chemistry journal article supplement (doi:10.1039/c8an01868e), 2018-11-07
Supplement: c8an01868e1.pdf [file c8an01868e1.pdf]

## Tin oxide nanoparticles modified by copper as novel catalysts for luminol–H<sub>2</sub>O<sub>2</sub>-based chemiluminescence system

Christina Vakh, Aleksei Pochivalov, Anastasiia Podurets, Natalia Bobrysheva,  
Olga Osmolovskaya, Andrey Bulatov

*Institute of Chemistry, Saint-Petersburg University, St.Petersburg State University, SPbSU, SPbU,  
7/9 Universitetskayanab., St. Petersburg,199034 Russia*

\*Corresponding author. Tel.: +7-929-110-0987; fax: +7-812-372-4421.

*E-mail address: k.vakh@spbu.ru; kristina-fulmes@mail.ru (Ch. Vakh)*

### Electronic supplementary information

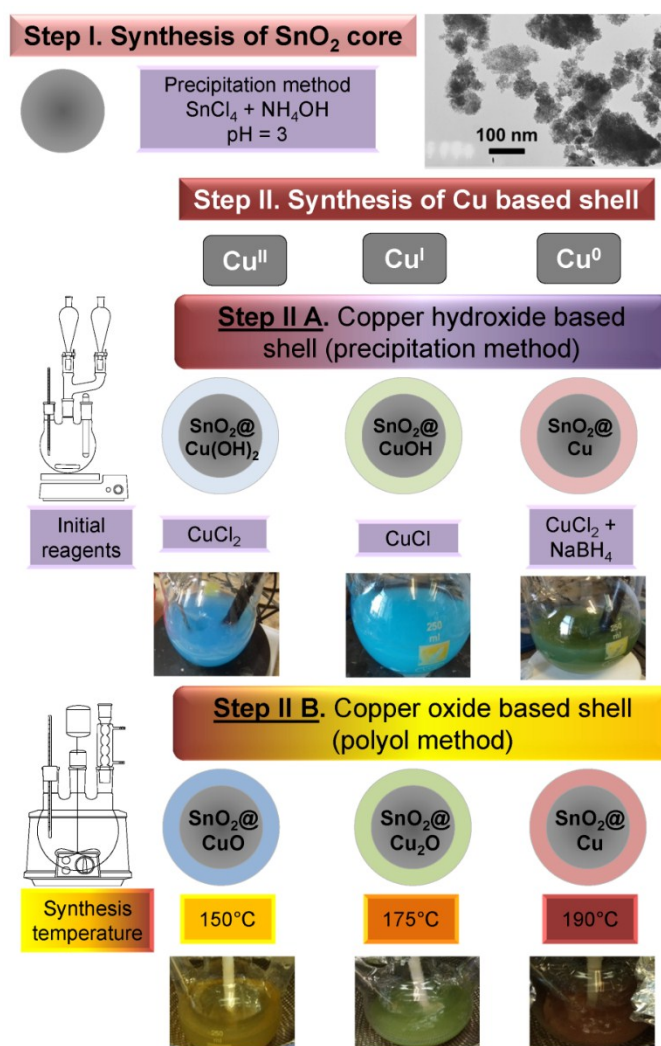

ESI Fig. 1. Synthesis schema of the SnO<sub>2</sub> nanoparticles modified by copper.

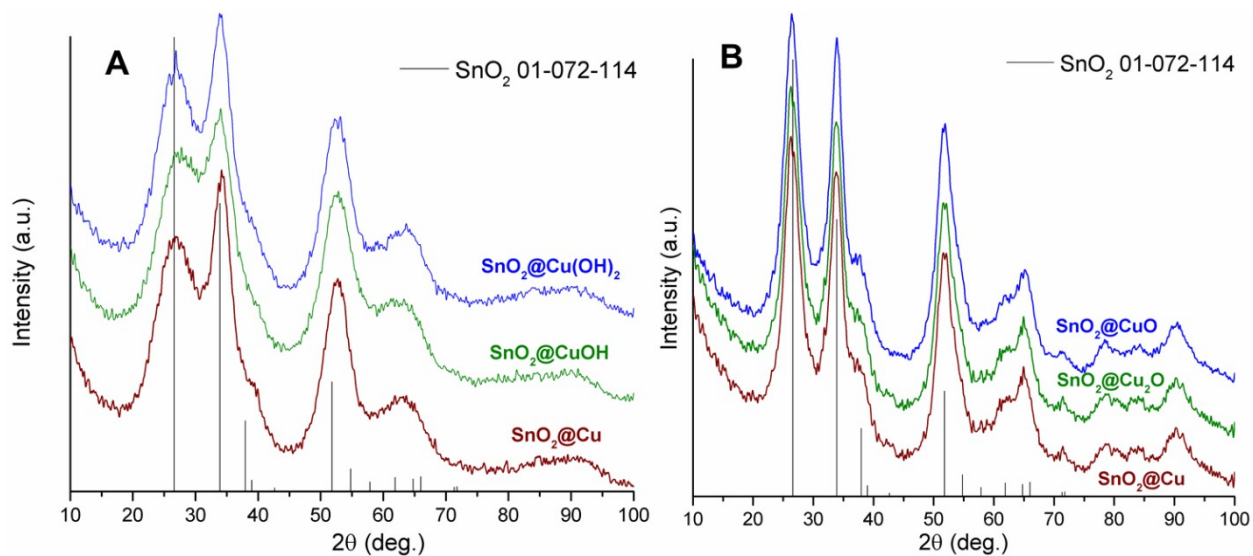

ESI Fig. 2. XRD pattern of  $\text{SnO}_2$  nanoparticles (line) modified by copper obtained by precipitation (A) and polyol (B) methods and International Center for Diffraction Data - Powder Diffraction File for  $\text{SnO}_2$  (bar).

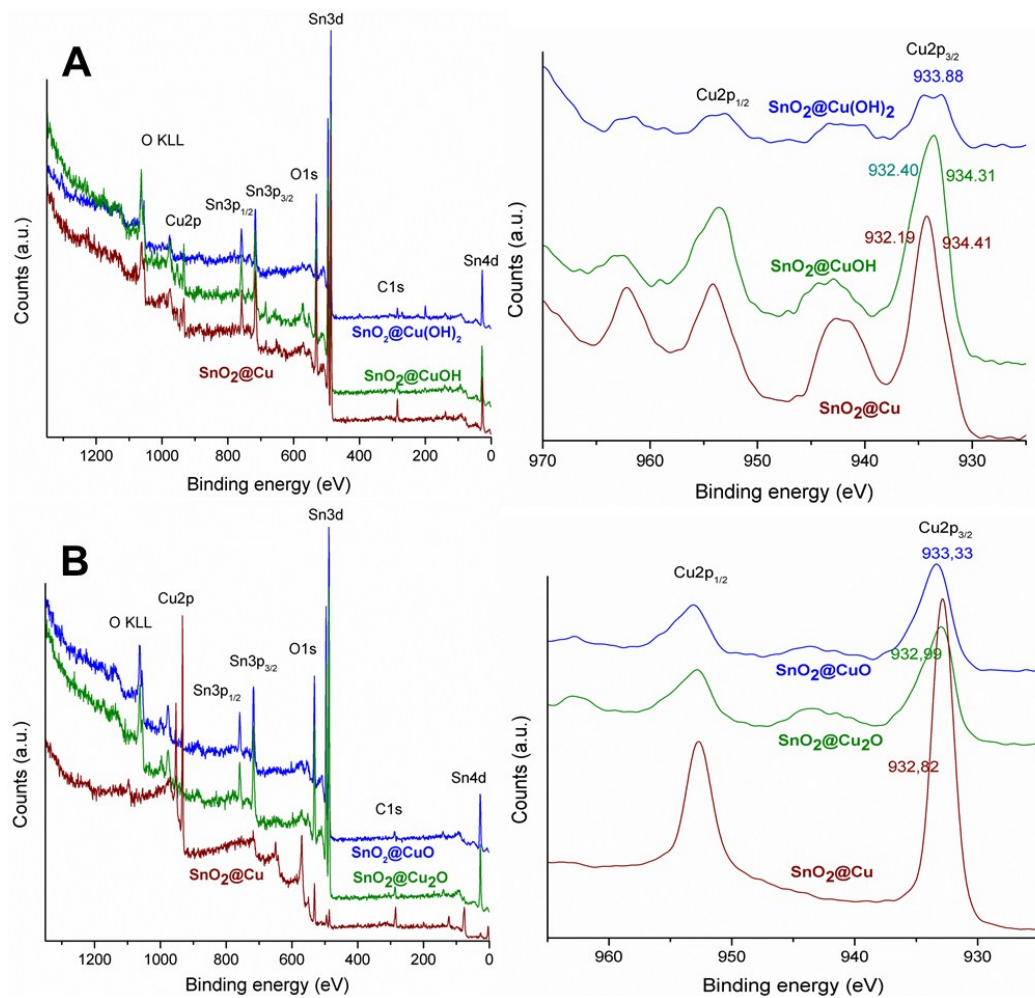

ESI Fig. 3. XPS spectra pattern for SnO<sub>2</sub> nanoparticles modified by copper obtained by precipitation (A) and polyol (B) methods: full spectrum (left) and copper 2p spectral area (right).

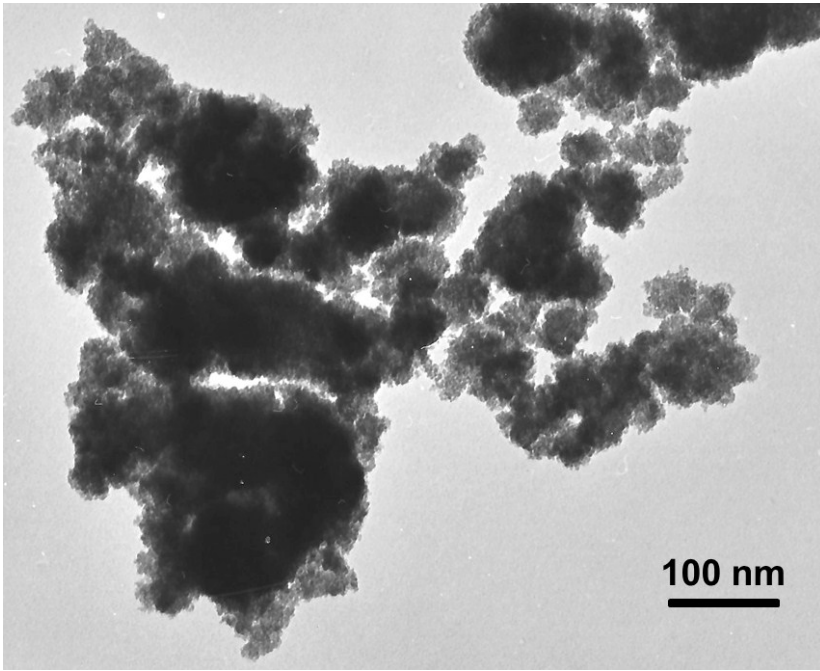

ESI Fig. 4. TEM image of  $\text{SnO}_2@ \text{Cu}_2\text{O}$  NPs ( $\text{SSA} = 260 \text{ m}^2 \text{ g}^{-1}$ ).

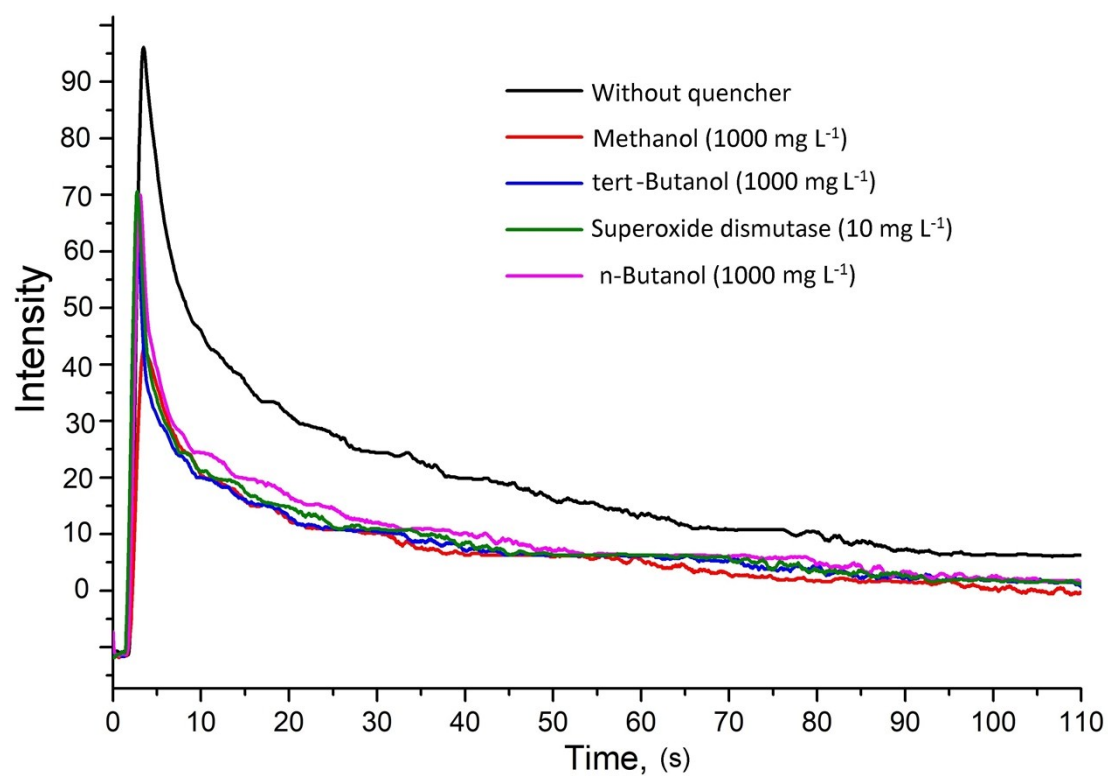

ESI Fig. 5. The effect of radical quenchers ( $C_{\text{luminol}}=0.2 \text{ mmol L}^{-1}$ ,  $C_{\text{H}_2\text{O}_2}=0.01 \text{ mol L}^{-1}$ ,  $C_{\text{NPs}}=100 \text{ mg L}^{-1}$ ).
